# Supplementary material for: Enhanced Tribological Performance of Low-Friction Nanocomposite WSexSy/NP-W Coatings Prepared by Reactive PLD
Source: MDPI journal article supplement (doi:10.3390/nano13061122), 2023-03-21
Supplement: s1 [file s1]

## Supplementary Materials

# Enhanced Tribological Performance of Low-Friction Nanocomposite $\text{WSe}_x\text{S}_y/\text{NP-W}$ Coatings Prepared by Reactive PLD

Vyacheslav Fominski <sup>1,\*</sup>, Dmitry Fominski <sup>1</sup>, Maxim Demin <sup>2</sup>, Roman Romanov <sup>1</sup> and Alexander Goikhman <sup>2</sup>

<sup>1</sup> National Research Nuclear University MEPhI (Moscow Engineering Physics Institute), Kashirskoe shosse. 31, 115409 Moscow, Russia

<sup>2</sup> Kant Baltic Federal University, A. Nevskogo St. 14, 236016 Kaliningrad, Russia

\* Correspondence: vyfominskij@mephi.ru

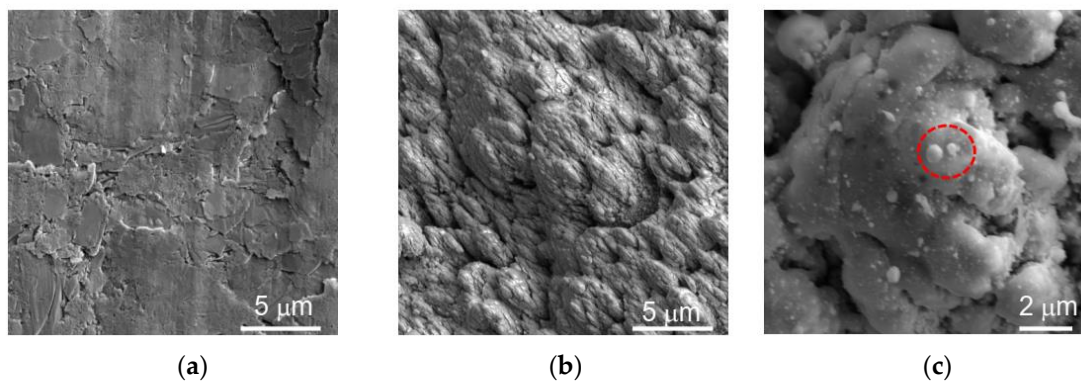

**Figure S1.** SEM images of (a) as prepared and (b,c) laser ablated  $\text{WSe}_2$  target with two magnifications; the area for EDS analysis is indicated in a red circle in (c).

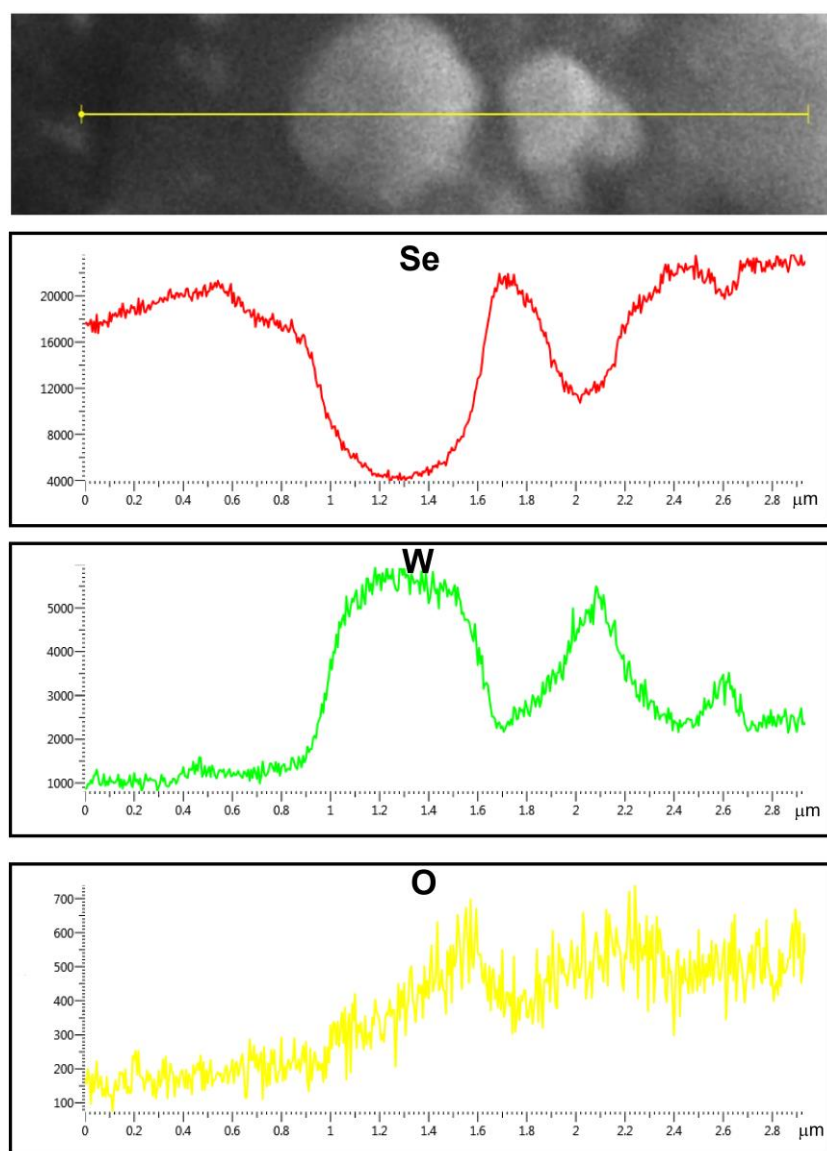

**Figure S2.** Distribution of elements in a local area of the  $\text{WSe}_2$  target subjected to laser ablation. The area is indicated in Figure S1c, and it contains spherical particles which were formed after laser ablation.

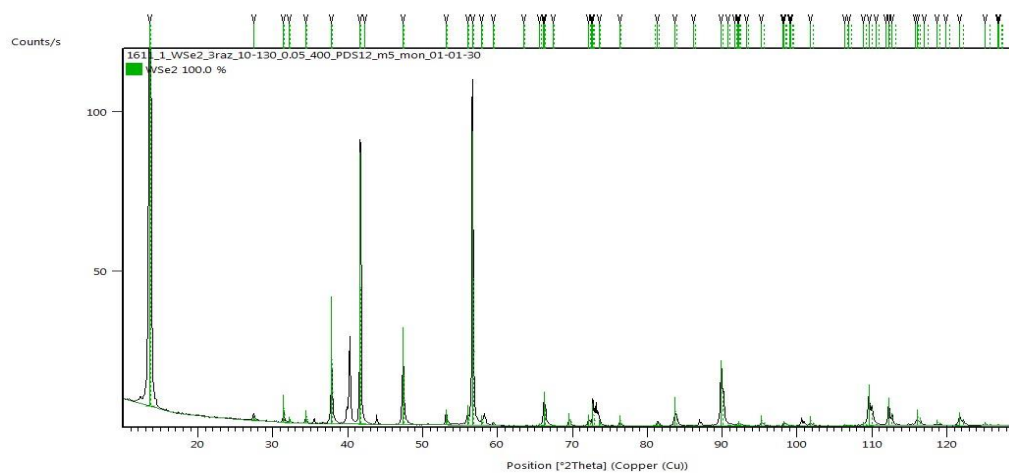

(a)

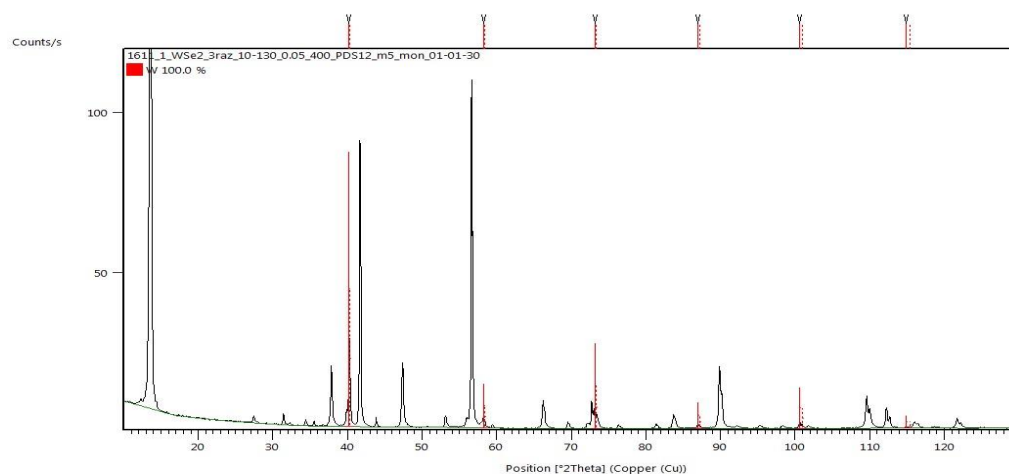

(b)

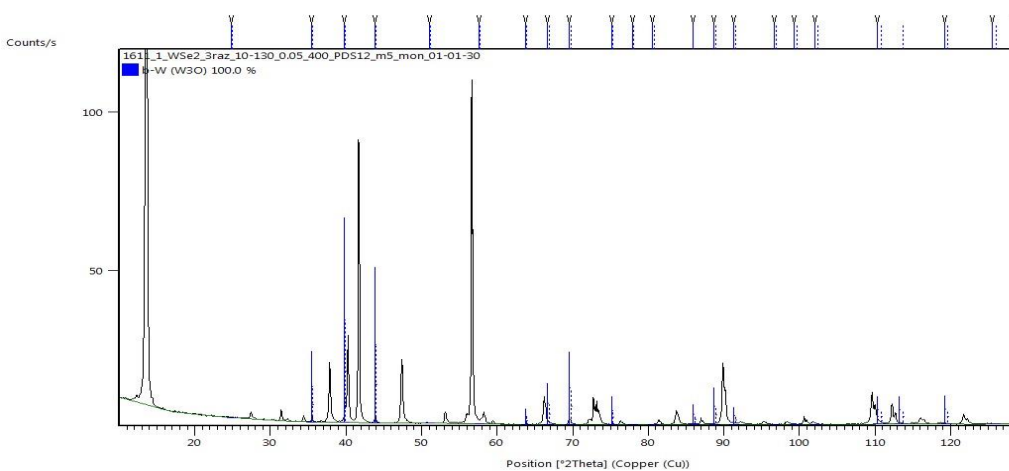

(c)

**Figure S3.** XRD pattern of laser ablated WSe<sub>2</sub> target exhibits the content of (a) WSe<sub>2</sub> (P6<sub>3</sub>/mmc), (b) α-W (Im3m), and (c) W<sub>3</sub>O/β-W (Pm3n) phases.

The diffraction patterns were measured on a PANalytical Empyrean Series 2 X-ray diffractometer using monochromatized CuKα radiation. The phase composition was analyzed using the PANalytical High Score Plus software and the ICDD PDF-2 database.

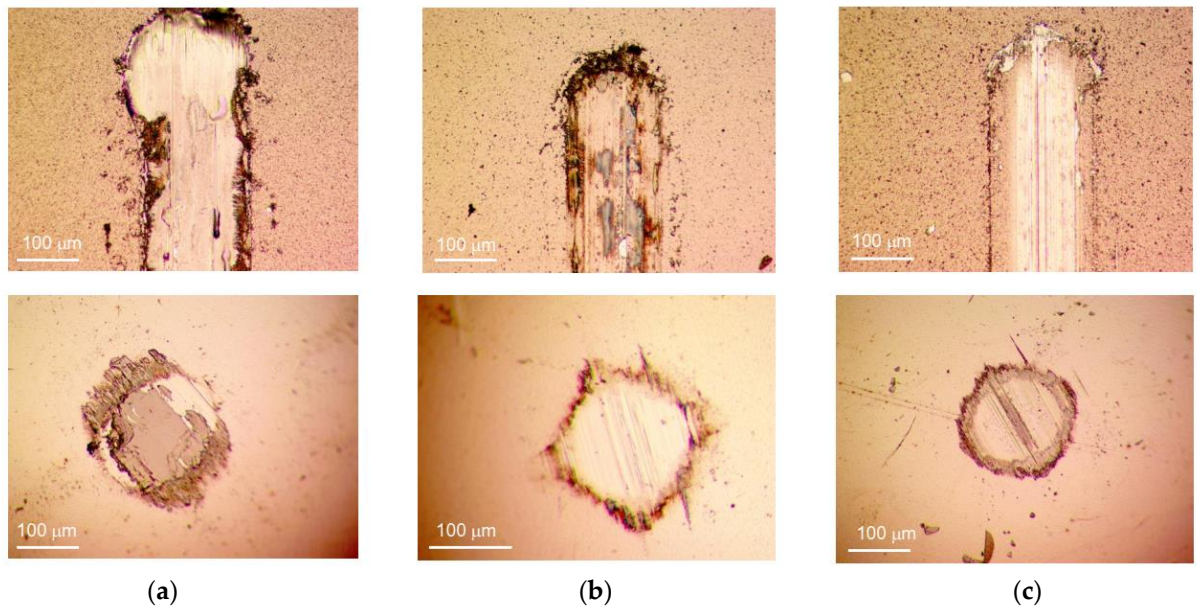

**Figure S4.** Optical images of the wear tracks and wear scars for (a) WSe<sub>x</sub>/NP-W, (b) WSe<sub>x</sub>S<sub>y</sub>/NP-W\_3.6, and (c) WSe<sub>x</sub>S<sub>y</sub>/NP-W\_9 coatings after tribotesting in N<sub>2</sub>-enriched environment at a load of 5 N at -100°C. The test duration for each coating is indicated in Figure 7.
